# Supplementary material
Source: PubMed Central journal article supplement (PMC6707842)
Supplement: NIHMS1532022-supplement-2.pdf [file NIHMS1532022-supplement-2.pdf]

**Supplemental Information**

**Multidomain Convergence of Argonaute  
During RISC Assembly Correlates with  
the Formation of Internal Water Clusters**

**Mi Seul Park, Raul Araya-Secchi, James A. Brackbill, Hong-Duc Phan, Audrey C. Kehling, Ekram W. Abd El-Wahab, Daniel M. Dayeh, Marcos Sotomayor, and Kotaro Nakanishi**

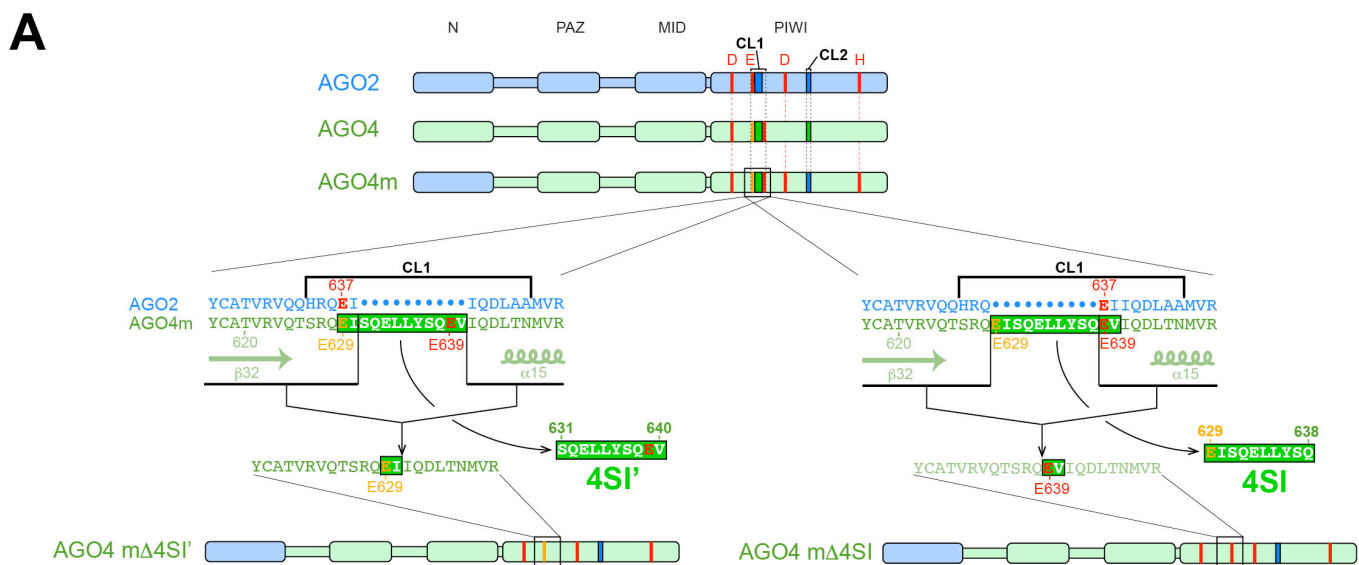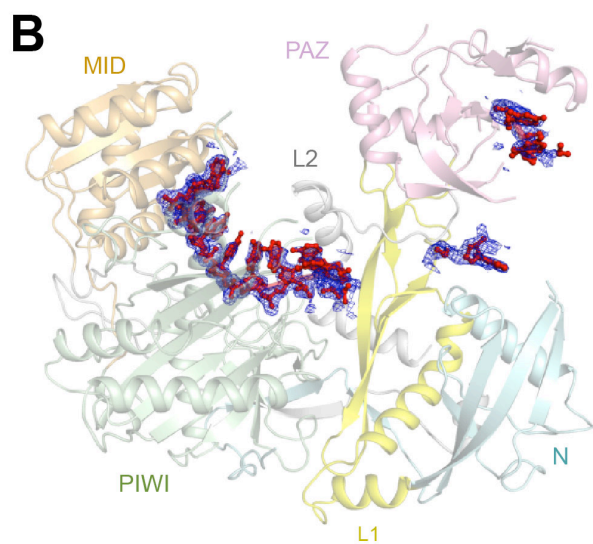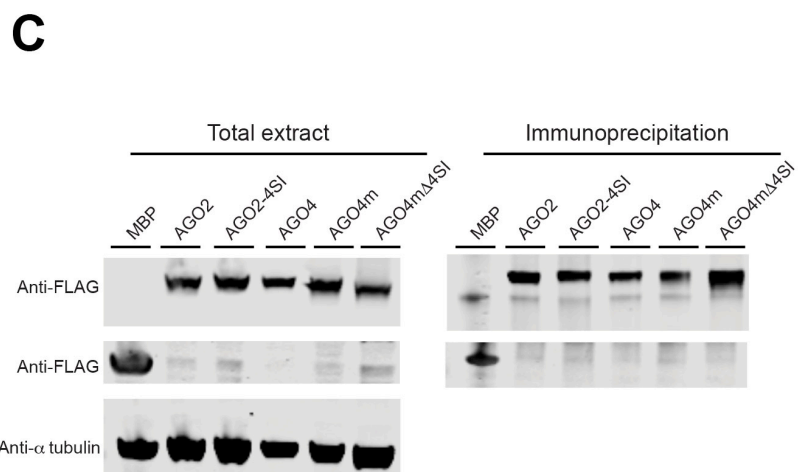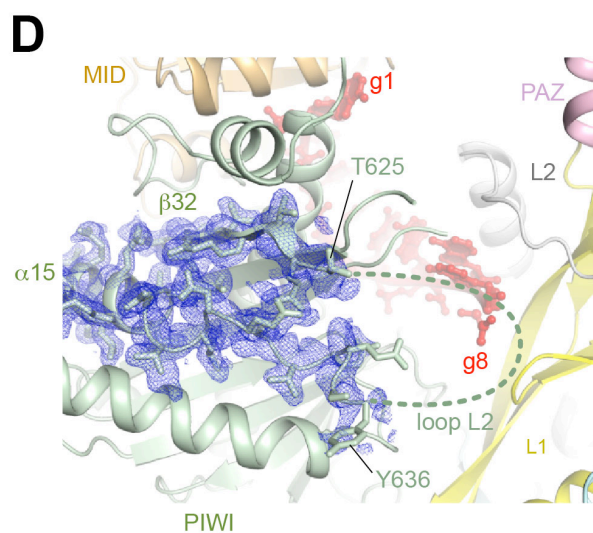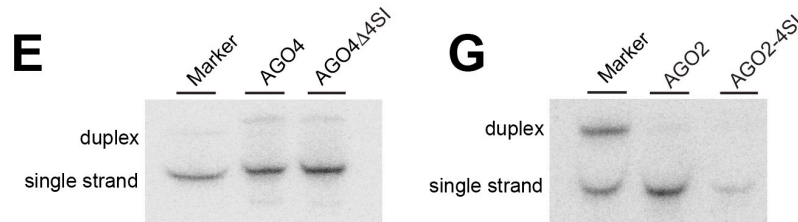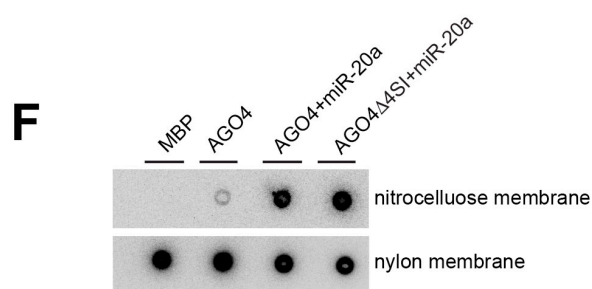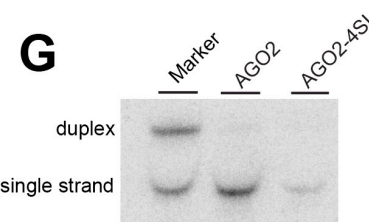

**Figure S1. Strategy for making AGO4 into a catalytically active enzyme (Related to Figure 1)**

(A) Differences in the construct used by Hauptmann *et al.* (left) and that used in the current study (right), both of which generate a catalytically active AGO4 mutant.

(B) Simulated annealing  $F_o-F_c$  omit map contoured at  $2.5 \sigma$  (blue mesh) around the guide RNA. Colors as in Figure 1B.

(C) FLAG-AGO2, FLAG-AGO4 and their mutants were expressed in HEK293T cells and detected with anti-FLAG antibody (left). Their protein amounts were adjusted based on the western blot (right) and used for target cleavage assay (Figure 1E).

(D) Simulated annealing  $F_o-F_c$  omit map contoured at  $2.2 \sigma$  (blue mesh) around  $\alpha 15$  and  $\beta 32$  of AGO4. The disordered loop L2, including 4SI, is depicted as dotted lines. Colors as in (B).

(E) RISC maturation assays of AGO4 and AGO4 $\Delta$ 4SI (Figure 1H and 1I). The lysates of HEK293T cells expressing either FLAG-AGO4 or FLAG-AGO4 $\Delta$ 4SI were adjusted by western blot so as to include 50 pmol of AGO, followed by incubation with miR-20a duplex. The duplex is composed of a 5' end labeled miR-20a and a fully complementary passenger strand that lacks a 5' monophosphate. After immunoprecipitation with anti-FLAG beads, the AGO-bound RNAs were extracted and resolved on 10% native gel.

(F) Filter binding assay of MBP, AGO4, and AGO4 $\Delta$ 4SI. The lysates of HEK293T cells expressing either FLAG-MBP, FLAG-AGO4 or FLAG-AGO4 $\Delta$ 4SI were incubated with miR-20a duplexes and then immunoprecipitated with anti-FLAG beads. After the AGOs were eluted from the beads with FLAG peptides, the AGOs were incubated with 60-nt 5' cap labeled mismatch targets. The resultants were spotted on a nitrocellulose membrane and a nylon membrane. AGO4 without miR-20a was used as a control to subtract the non-specific bound targets (Figure 1J).

(G) RISC maturation assays of AGO2 and AGO2-4SI (Figure 1K). The lysates of HEK293T cells expressing either FLAG-AGO2 or FLAG-AGO2-4SI were adjusted by western blot so as to include 50 pmol of AGO, followed by incubation with miR-20a duplex. The duplex is composed of a 5' end labeled miR-20a and a fully complementary passenger strand that lacks a 5' monophosphate. After immunoprecipitation with anti-FLAG beads, the AGO-bound RNAs were extracted and resolved on 10% native gel.

**A**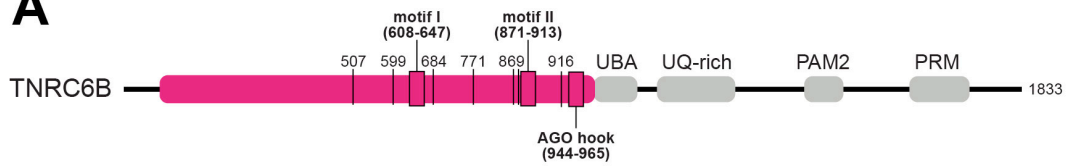**B**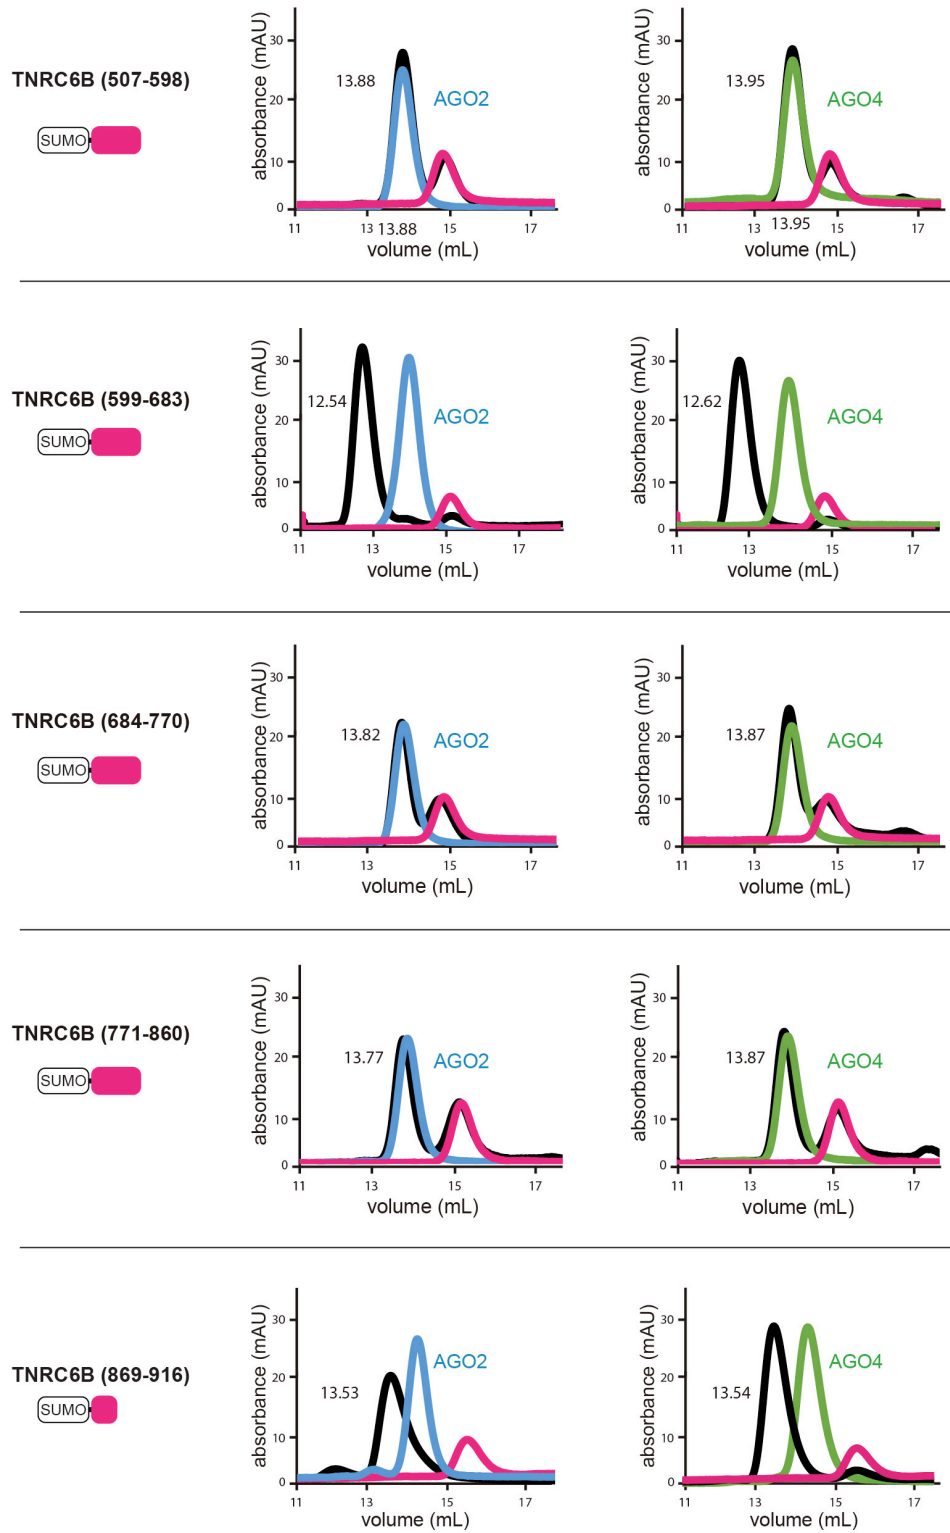

**Figure S2. Interactions of long TNRC6B fragments with AGO2 and AGO4 (Related to Figure 2)**

(A) Domain architecture of TNRC6B. Several long fragments were designed from the AGO-binding regions (pink) and expressed as SUMO-fused proteins.

(B) Gel filtration analyses of AGO2 (blue), AGO4 (green), SUMO-fused TNRC6B fragment (pink), and a mixture of a TNRC6B fragment with either AGO2 or AGO4 (black).

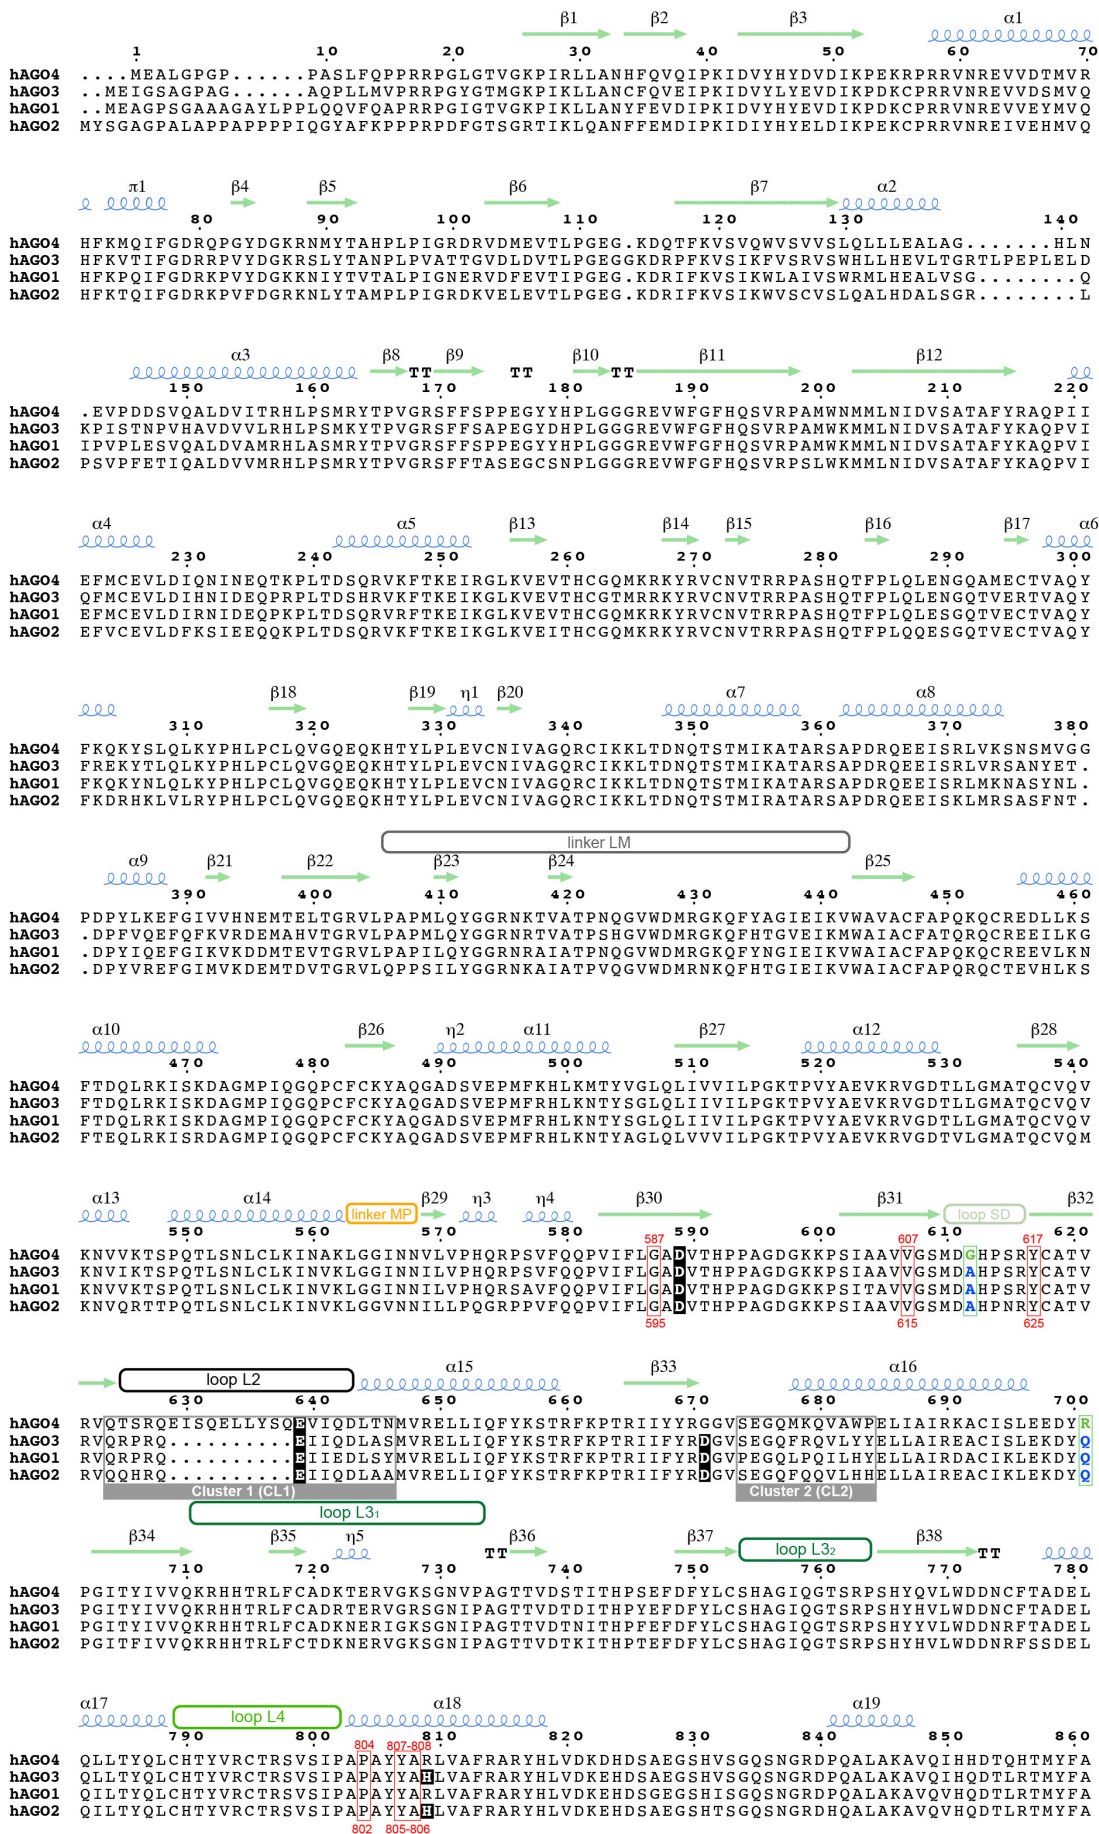

**Figure S3. Sequence alignment of human AGO paralogs (Related to Figure 2; Figure 3; Figure 4)**

Residue number and secondary structure of AGO4 are shown above the sequence. The four catalytic residues are highlighted with black columns. AGO4-specific residues in Trp Pocket-2 and -3 are boxed (green).

Residues involved in van der Waals interactions between two PIWI subdomains are boxed (red). Domain linkers and loops forming LAKE1 and LAKE2 are labeled above the sequence. CL1 and CL2 are boxed (gray).

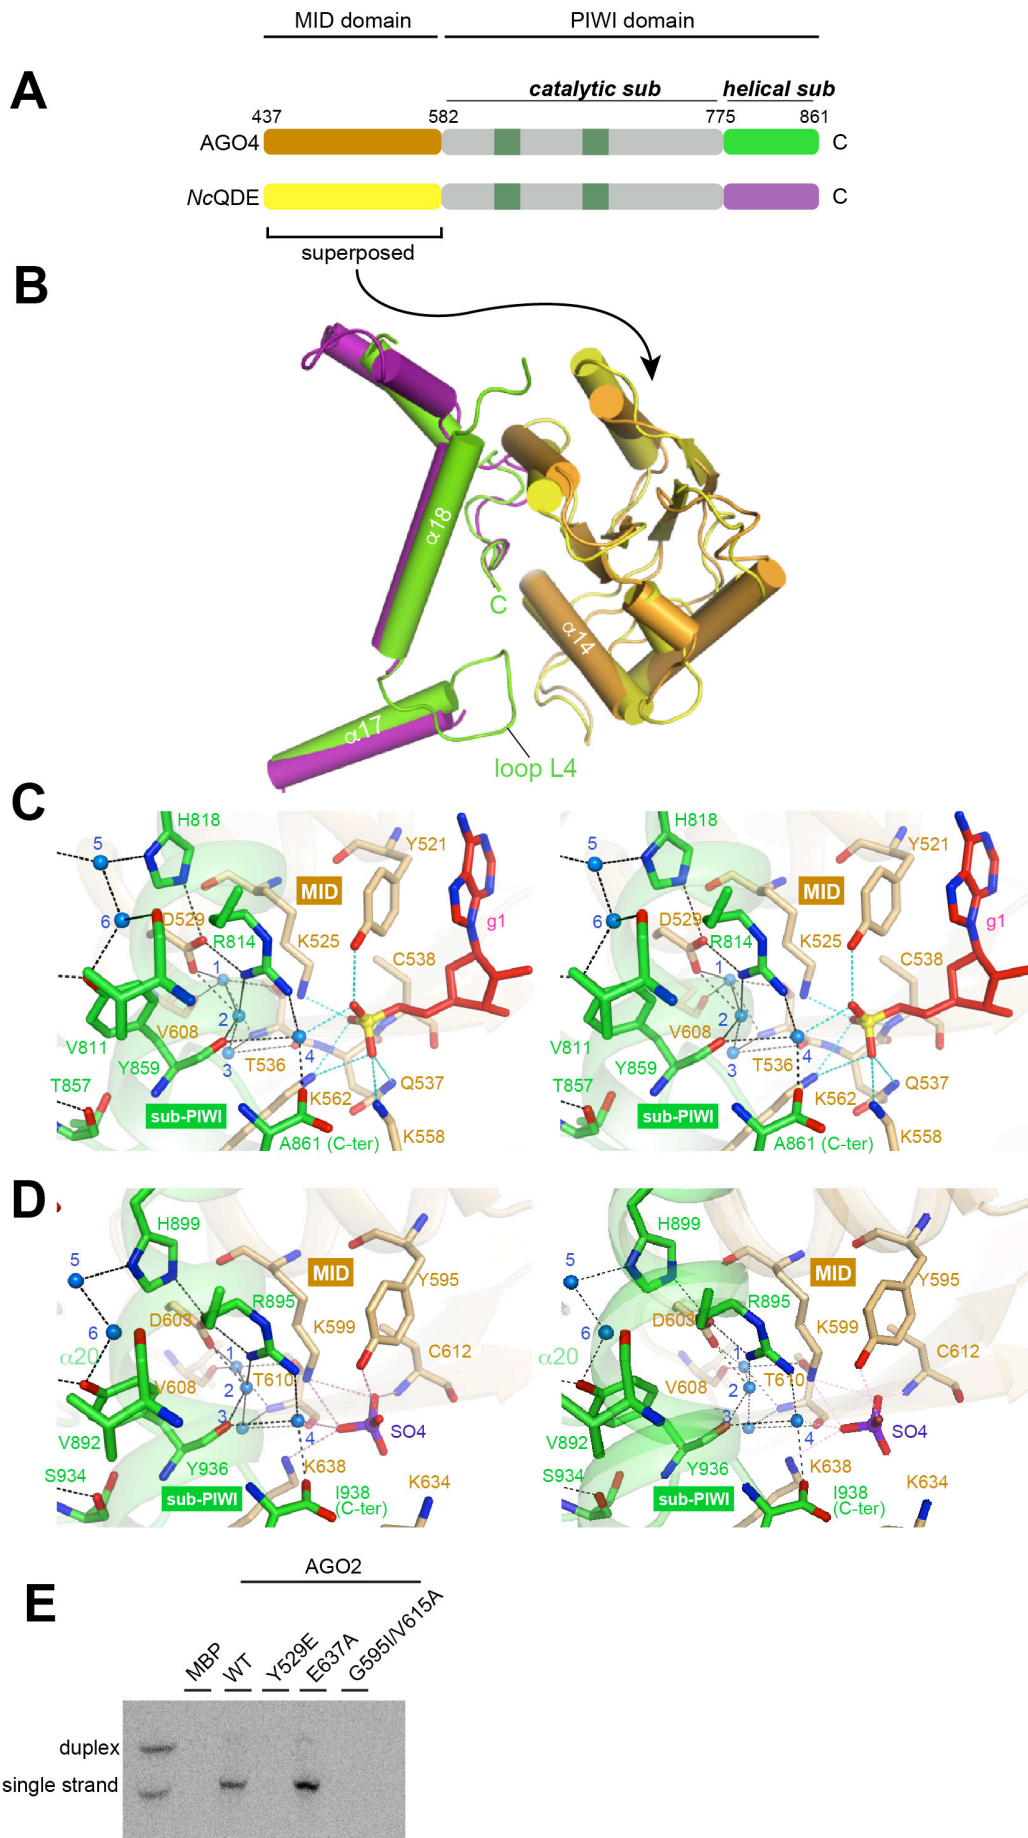



**Figure S4. Interactions between MID domain and PIWI-helical subdomain (Related to Figure 3; Figure 4)**

(A) MID-PIWI domain architectures of AGO4 and *NcQDE2*.

(B) Superposition of AGO4 and *NcQDE2* on their MID domains results in a good alignment of their PIWI-helical subdomains.

(C-D) Stereoviews of the interactions between the MID domain and PIWI-helical subdomain in AGO4 (C) and *NcQDE2* (D). Colors as in (A). Water molecules and hydrogen bonds are depicted as spheres (cyan) and dotted lines, respectively. For clarity, only g1 of the bound guide RNA is shown in (C). The bound sulfate ion is drawn as a stick model (magenta) in (D).

(E) A representative image of RISC maturation assay with siRNA duplex (Figure 3E).

**A**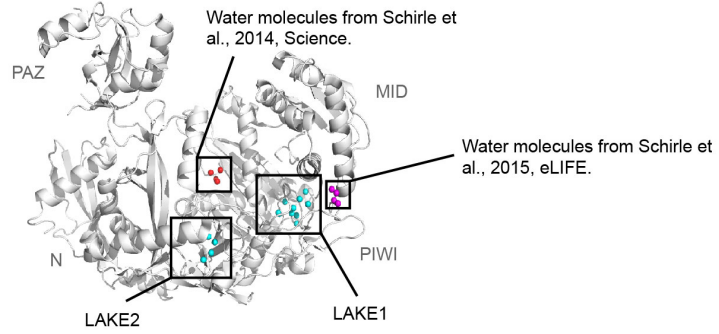**B**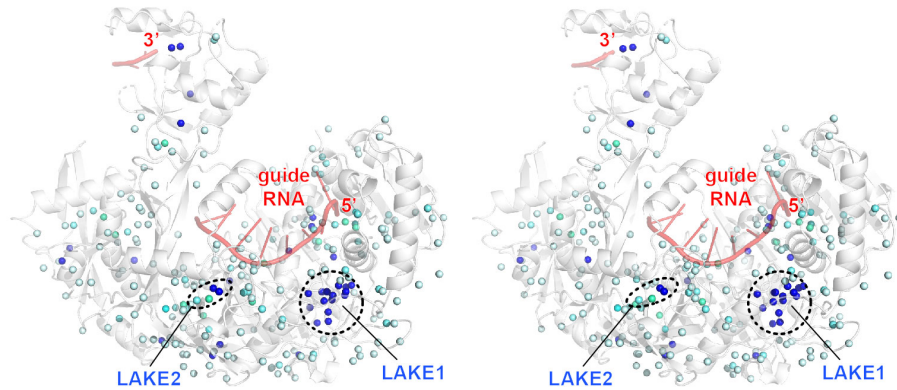**C**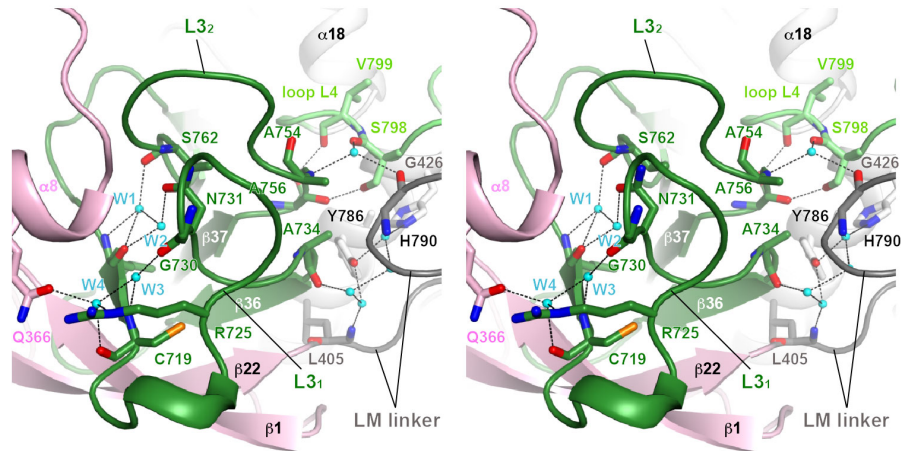**D**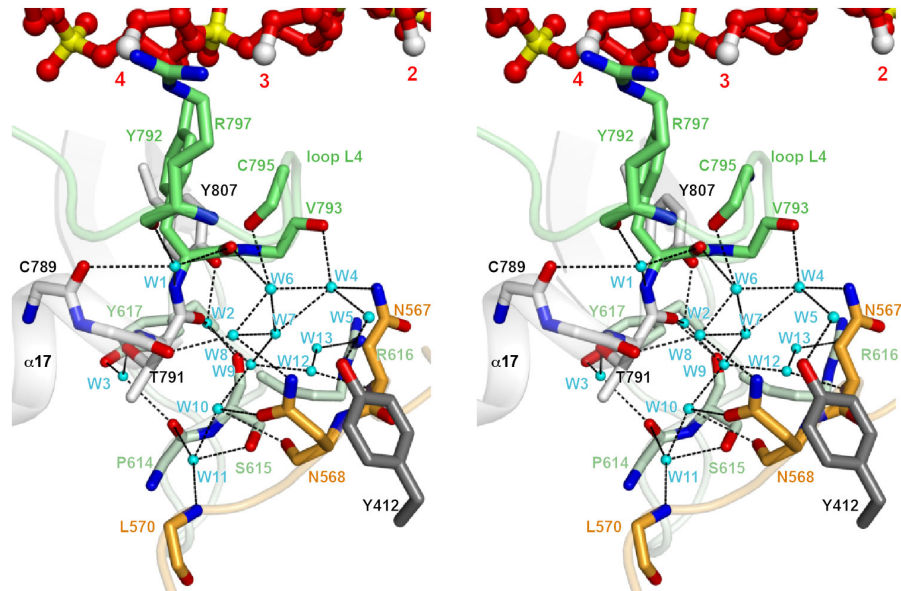

**Figure S5. Water-mediated hydrogen-bonding network (Related to Figure 5)**

(A) Locations of LAKEs (cyan) and the previously reported water molecules at the active site (red) and the target nucleotide-1 pocket (magenta).

(B) Stereoview of water molecules bound to AGO4. The intensity of the blue color indicates the categories of the water molecule. Dark blue, cyan, and faint blue spheres indicate buried, cleft, and surface water molecules, respectively.

(C-D) Stereoview of the internal water-mediated hydrogen-bonding network in LAKE2 (C) and LAKE1 (D). Water molecules and hydrogen bonds are depicted as cyan spheres and dotted lines, respectively. The bound RNA in (D) is drawn as a ball-and-stick model. Colors as in Figure 4C.

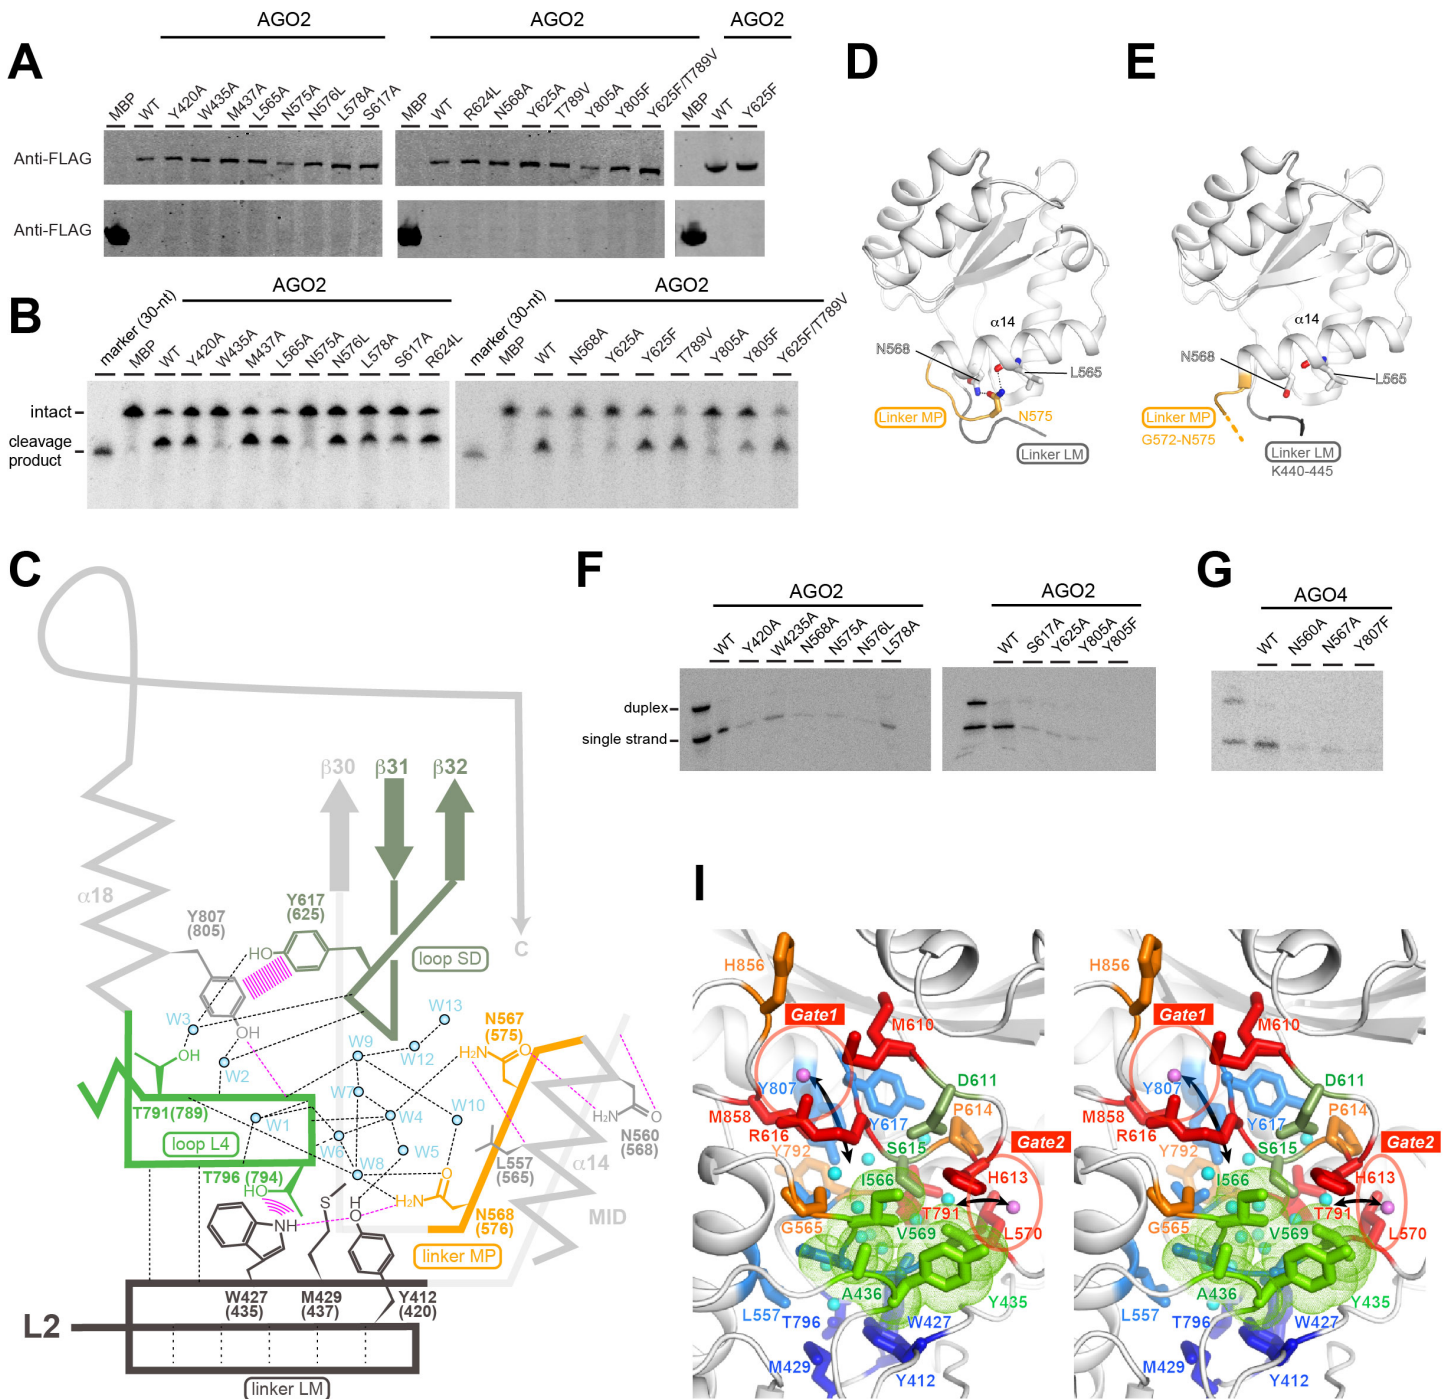

**Figure S6. Residues and their interactions required for LAKE1 formation (Related to Figure 5)**

(A) A representative image of western blot analysis with anti-FLAG antibody. Expression levels of mutants were tested, and the amount of proteins were adjusted for the target cleavage assay.

(B) A representative image of *In vitro* cleavage assay with miR-20a. All lysates were adjusted by western blots of (A) and the 5  $\mu$ M AGO proteins were incubated with 50 nM siRNA-like duplex of miR-20a for RISC assembly. 50 nM 5' cap-labeled target RNAs were used for the RNA cleavage reaction.

(C) A schematic of LAKE1. Conserved residues involved in the LAKE1 formation are shown. The internal water molecules and hydrogen bonds are depicted as spheres (cyan) and dotted lines (black), respectively. Hydrogen bonds not involving water molecules are colored in pink.

(D-E) Interactions between the MID domain and linker MP through two asparagine residues seen in the full-length AGO2 (D) (PDB ID: 4OLA) but not in the isolated AGO2 MID domain (E) (PDB ID: 3LUC).

(F-G) A representative image of RISC maturation assays with siRNA-like duplex of miR-20a (Figure 5H-5J).

(I) Stereoview of the two gates, Gate1 and Gate 2 (red circles), of the AGO4 LAKE1. Water molecules inside LAKE1 are colored in cyan. Two water molecules located just outside the two gates are colored in pink. Residues shaping the AGO4 LAKE1 can be categorized based on their roles; back wall (dark blue), middle wall (marine), gates (red), hydrophobic core (green), backbone (orange).

|        | 560                     | 570                      | 580          | 590                      | 600                     | 610                            |
|--------|-------------------------|--------------------------|--------------|--------------------------|-------------------------|--------------------------------|
| hAGO4  | NAKLGGINN               | VLVPHQR                  | PSVFQQPVI    | F <del>GL</del> ADVT     | HPPAGDGK                | KPSIAAVVGSMDG                  |
| hAGO3  | NV <del>KL</del> GGINN  | ILVPHQR                  | PSVFQQPVI    | F <del>GL</del> ADVT     | HPPAGDGK                | KPSIAAVVGSMDA                  |
| hAGO2  | NV <del>KL</del> GGVNN  | ILLPQGR                  | PPVFQQPVI    | F <del>GL</del> ADVT     | HPPAGDGK                | KPSIAAVVGSMDA                  |
| hAGO1  | NV <del>KL</del> GGINN  | ILVPHQR                  | SAVFQQPVI    | F <del>GL</del> ADVT     | HPPAGDGK                | KPSITAVVGSMDA                  |
| DmAgo1 | NV <del>KL</del> GGINS  | ILVPSIR                  | PKVFNEPVI    | F <del>GL</del> ADVT     | HPPAGDNK                | KPSIAAVVGSMDA                  |
| CeALG1 | NV <del>KL</del> GGVNS  | ILLPNVR                  | PRIFNEPVI    | F <del>GL</del> CDLTH    | PPAGDSRK                | KPSIAAVVGSMDA                  |
| AtAG01 | NV <del>KL</del> VGGRR  | TVLVDALS                 | RRIPLVSDR    | PTIIF <del>GL</del> ADVT | HPPHGEDS                | SPSIAAVVGSQDWPEI               |
| DmAub  | NAKLMGAP                | IQVVIPLH                 | GLMTVGF      | DVCHSP                   | KNKNK                   | SYGAFVATMDQKES                 |
| DmPiwi | NCKLGKYP                | MIELPLS                  | GLMTIGF      | DI AKSTR                 | DRKR                    | AYGALIASMDLQON                 |
| BmAgo3 | NCKLGGTL                | WISISPFK                 | SAMIVGI      | DSYHDP                   | SRRNR                   | SVCSFVASYNQSM                  |
| Miwi   | MNCKMGGEL               | WRVDMPLK                 | LAMIVGI      | DCYHDT                   | TAGRR                   | SIAGFVASINEGM                  |
| DmAgo3 | NCKLGGSL                | WTVKIPFK                 | NVMIVGI      | DSYHDP                   | SNRGN                   | SVAAFVASINSSY                  |
| Siwi   | NCKLGGSP                | WTVDIPLP                 | SLMVVGY      | DVCHDTR                  | SKEK                    | SFGAFVATLDKQM                  |
|        |                         | 655                      |              |                          |                         |                                |
|        | 620                     | 630                      | 640          | 650                      | 660                     |                                |
| hAGO4  | SRYCATV                 | RVQTSRQE                 | EISQELLYS    | QEVIQDLT                 | NMVRELLIQFYKSTR         |                                |
| hAGO3  | SRYCATV                 | RVQRFRQ                  | EIIQDLA      | SMVRELLIQFYKSTR          |                         |                                |
| hAGO2  | NR <del>Y</del> CATV    | RVQQHRQ                  | EIIQDLA      | AMVRELLIQFYKSTR          |                         |                                |
| hAGO1  | SRYCATV                 | RVQRFRQ                  | EIIEDLS      | YMVRELLIQFYKSTR          |                         |                                |
| DmAgo1 | SRYAATV                 | RVQQHRQ                  | EIIQELS      | SMVRELLIMFYKSTGG         |                         |                                |
| CeALG1 | SRYAATV                 | RVQQHRQ                  | EIISDLT      | YMVRELLIQFYRNR           |                         |                                |
| AtAG01 | TKYAGL                  | VCAQHRQ                  | ELIQDLF      | KKEWKDPQ                 | KGVVTTGGMIKELLIAFRSTG   |                                |
| DmAub  | FRYFSTV                 | NEHIKGO                  | ELSEQMS      | VNMACALRS                | YQEQHR                  |                                |
| DmPiwi | STYFSTV                 | TECSAFD                  | VLANTLW      | PMAKALRQY                | QHEHR                   |                                |
| BmAgo3 | TLWYSKV                 | IFQEKGO                  | EIVDGLK      | CCLVDAL                  | THWYLRNSG               |                                |
| Miwi   | TRWFSRC                 | VFQDRGO                  | ELVDGLK      | VCLQAAL                  | RAWSGCNE                |                                |
| DmAgo3 | SQWYSKA                 | VVQTKRE                  | EIVNGLS      | ASFEIAL                  | KMYRKRNG                |                                |
| Siwi   | TOYYSIV                 | NAHTSGE                  | ELSSHMG      | FNIASAV                  | KKFREKNG                |                                |
|        | 670                     | 680                      | 690          | 700                      | 710                     |                                |
| hAGO4  | FKPTRI                  | IYR <del>RD</del> GV     | SEGMKQ       | VAWPELI                  | AIKACISLEEDYR           | PGITYIVVQKRHHTR                |
| hAGO3  | FKPTRI                  | IYR <del>RD</del> GV     | SEGFQ        | RQVLYYELL                | AIKACISLEEKDY           | QPGITYIVVQKRHHTR               |
| hAGO2  | FKPTRI                  | IYR <del>RD</del> GV     | SEGFQ        | QVLHHELL                 | AIKACISLEEKDY           | QPGITFIVVQKRHHTR               |
| hAGO1  | FKPTRI                  | IYR <del>RD</del> GV     | SEGFQ        | PQILHYELL                | AIKACISLEEKDY           | QPGITYIVVQKRHHTR               |
| DmAgo1 | YKPHRI                  | IYR <del>RD</del> GV     | SEGFQ        | PHVLQHELT                | AIKACISLEEKDY           | QPGITFIVVQKRHHTR               |
| CeALG1 | FKPARIV                 | VYR <del>RD</del> GV     | SEGFQ        | FNVLYYELR                | AIKACISLEEKDY           | QPGITFIVVQKRHHTR               |
| AtAG01 | HKPLRRI                 | IYR <del>RD</del> GV     | SEGFQ        | FYQVLLYELD               | AIKACISLEEKDY           | QPGITFIVVQKRHHTR               |
| DmAub  | SLFERIL                 | FFR <del>RD</del> GV     | GDGQL        | YQVNVSEV                 | NLTKDR                  | LDDEIYKSAGKQEGCRMTFIIVSKRINRSR |
| DmPiwi | KLERSR                  | IVFYR <del>RD</del> GV   | VSSG         | SLKQLF                   | EVDIEK                  | LKTEYARVQ.LSPPQLAYIVVTRSMNTR   |
| BmAgo3 | QLDRRI                  | IYR <del>RD</del> GV     | GDGQL        | KLQY                     | EIP                     | QMKICFTILGSNYQPTLTLYIVVQKRINTR |
| Miwi   | YMP                     | SRVIVYR <del>RD</del> GV | GDGQL        | KTLVNYEVP                | QFLD                    | CLKSVGRGYNPRLTIVVKKRVNAR       |
| DmAgo3 | KLPTNII                 | IYR <del>RD</del> GV     | GDGQL        | LYTCLNYEIP               | QFEMVC                  | GNRIKISYIVVQKRINTR             |
| Siwi   | TYPARIF                 | IYR <del>RD</del> GV     | GDGQL        | IPYVHSH                  | EVAEIK                  | KKLAEIY.AG.VEIKLAFIIVSKRINTR   |
|        | 720                     | 730                      | 740          | 750                      | 760                     | 770                            |
| hAGO4  | LF <del>CA</del> DKT    | ER.VG                    | KSGNIP       | PAGTV                    | DS <del>TI</del> THPSEF | DFYLC                          |
| hAGO3  | LF <del>CA</del> DRTER  | .VGR                     | SGNIP        | PAGTV                    | DT <del>DI</del> THPYEF | DFYLC                          |
| hAGO2  | LF <del>CA</del> TDKNER | .VG                      | KSGNIP       | PAGTV                    | DT <del>TI</del> HTPTEF | DFYLC                          |
| hAGO1  | LF <del>CA</del> DKNER  | .IG                      | KSGNIP       | PAGTV                    | DT <del>NI</del> THPFEF | DFYLC                          |
| DmAgo1 | LF <del>CA</del> EKKEQ  | .SG                      | KSNIP        | PAGTV                    | DV <del>GI</del> THPTEF | DFYLC                          |
| CeALG1 | LF <del>CA</del> VDKDDQ | .VG                      | KSNIP        | PAGTV                    | DV <del>GI</del> THPTEF | DFYLC                          |
| AtAG01 | LF <del>CA</del> QNHND  | RRHSVDR                  | SGNIP        | PAGTV                    | DS <del>KI</del> CHPTEF | DFYLC                          |
| DmAub  | YFTGHR                  | NP                       | VPGTV        | DDVITL                   | PERYD                   | DFLVSQ                         |
| DmPiwi | FFLNGQ                  | NPP                      | PGTIV        | DDVITL                   | PERYD                   | DFLVSQ                         |
| BmAgo3 | IFLKS                   | RDGY                     | DNP          | PGTIV                    | DHCIT                   | TRRDWYDFLIVS                   |
| Miwi   | IFFAQ                   | SGGRL                    | QNP          | PGTIV                    | DVEVTR                  | PEWYDFLIVS                     |
| DmAgo3 | IFSGS                   | GIHL                     | ENP          | PGTIV                    | DQHIT                   | KSNTMYDFLIVS                   |
| Siwi   | IFVQR                   | GRSG                     | ENP          | PGTIV                    | DDVITL                  | PERYD                          |
|        |                         | 797                      |              | 818                      | 827                     |                                |
|        | 780                     | 790                      | 800          | 810                      | 820                     | 830                            |
| hAGO4  | CFTADEL                 | QLTYQL                   | CHTYVR       | CTR                      | SVSIPAPAYY              | ARLVAFRARYHLVDKDHDSDA          |
| hAGO3  | CFTADEL                 | QLTYQL                   | CHTYVR       | CTR                      | SVSIPAPAYY              | AHLVAFRARYHLVDKEHDSDA          |
| hAGO2  | RFSSDEL                 | QLTYQL                   | CHTYVR       | CTR                      | SVSIPAPAYY              | AHLVAFRARYHLVDKEHDSDA          |
| hAGO1  | RFTADEL                 | QLTYQL                   | CHTYVR       | CTR                      | SVSIPAPAYY              | ARLVAFRARYHLVDKEHDSG           |
| DmAgo1 | HFDSDEL                 | QLTYQL                   | CHTYVR       | CTR                      | SVSIPAPAYY              | AHLVAFRARYHLVEKEHDSG           |
| CeALG1 | NLTADEL                 | QLTYQ                    | MCHTYVR      | CTR                      | SVSIPAPAYY              | AHLVAFRARYHLVDREHDSG           |
| AtAG01 | NFTADEL                 | QLTYQ                    | MCHTYVR      | CTR                      | SVSIPAPAYY              | AHLAAFRARFYMEDRETSDSGSMASGSM   |
| DmAub  | GLNADK                  | LOML                     | SYKMT        | MYN                      | YS                      | SGTIRVPAVCHYAHKLAFLVAESINRAP   |
| DmPiwi | GLSPGK                  | MOKL                     | TYKMCH       | LYY                      | NWS                     | GTRVPAVCOYAKKLATLVGTNLHSIP     |
| BmAgo3 | GITPDQ                  | CORL                     | TYKMCH       | LYY                      | NWP                     | GTTRVPAVCOYAHKLSYLVGQCVHAQP    |
| Miwi   | GLKPDH                  | IQR                      | TYKLC        | HLY                      | NWP                     | GVIRVPAVCOYAHKLAFLVGSIQHREP    |
| DmAgo3 | NYGPDII                 | OKL                      | SYKLC        | CFLY                     | NW                      | AGTVRIPACCMYAHKLAFLYLGQSIQRD   |
| Siwi   | GLNPDRI                 | QR                       | TYKLT        | HLTY                     | ENC                     | SSQVRVPSVCOYAHKLAFLAANSLHNQP   |
|        |                         | 856                      | 858          | 850                      | 860                     |                                |
| hAGO4  | VSG                     | QSN                      | GRDPQALAKAV  | QIH                      | HDTQHTMYFA              |                                |
| hAGO3  | VSG                     | QSN                      | GRDPQALAKAV  | QIH                      | QDTLRTMYFA              |                                |
| hAGO2  | TSG                     | QSN                      | GRDQALAKAV   | QVH                      | QDTLRTMYFA              |                                |
| hAGO1  | ISG                     | QSN                      | GRDPQALAKAV  | QVH                      | QDTLRTMYFA              |                                |
| DmAgo1 | QSG                     | QSN                      | EDRTPGAMARAI | TVH                      | ADTKKVMYFA              |                                |
| CeALG1 | PSG                     | QSN                      | EDTTLSN      | MARAV                    | QVHPDANNVMYFA           |                                |
| AtAG01 | ARGGG                   | MAGR                     | STRGPN       | VNA                      | AVRPLPALKENVKRVMFYC     |                                |
| DmAub  |                         |                          |              |                          | SAGLQNL                 | YFL                            |
| DmPiwi |                         |                          |              |                          | QNALEK                  | KFYFL                          |
| BmAgo3 |                         |                          |              |                          | SDVL                    | VDKLFFL                        |
| Miwi   |                         |                          |              |                          | NLSL                    | NRLYYL                         |
| DmAgo3 |                         |                          |              |                          | AEAL                    | SEKLYFL                        |
| Siwi   |                         |                          |              |                          | HYSL                    | NETLYFL                        |

**Figure S7. Sequence alignment of AGO- and PIWI-clade proteins (Related to Figure 7)**

Residues highlighted in red participate in the van der Waals interaction between two PIWI subdomains.

Residues in colored boxes (linker MP: orange, L3<sub>1</sub> and L3<sub>2</sub>: dark green, loop L4: bright green) have different properties between AGO and PIWI clades. Residue numbers of AGO4 and Siwi are shown above and below the sequence alignment, respectively. AGO-specific insert in L3<sub>1</sub> is colored in yellow (see Figure 7C-D).

Table S1. Detailed simulation statistics of LAKE1 and LAKE2 of AGO2<sub>cw</sub> and AGO4<sub>cw</sub> (Related to Figure 6)

| AGO and Temp                | Cavity | Number of water molecules |     |          |     |     |        | Avg. Occup.* | $t_1$ (ps) | $t_2$ (ps) |
|-----------------------------|--------|---------------------------|-----|----------|-----|-----|--------|--------------|------------|------------|
|                             |        | Mean                      | SD  | Variance | max | min | median |              |            |            |
| AGO4 <sub>cw</sub><br>300 K | LAKE1  | 10.3                      | 1.8 | 3.2      | 18  | 5   | 10     | 10 ± 2       | 34.6       | 3.6        |
|                             | LAKE2  | 7.3                       | 1.6 | 2.7      | 18  | 3   | 7      | 7 ± 2        | -          | -          |
| AGO4 <sub>cw</sub><br>310 K | LAKE1  | 10.2                      | 1.5 | 2.3      | 18  | 6   | 10     | 10 ± 2       | 31.4       | 3.2        |
|                             | LAKE2  | 6.1                       | 1.1 | 1.3      | 11  | 2   | 6      | 6 ± 1        | -          | -          |
| AGO2 <sub>cw</sub><br>300 K | LAKE1  | 12.7                      | 1.4 | 2.1      | 19  | 8   | 13     | 13 ± 1       | 42.2       | 3.5        |
|                             | LAKE2  | 4.7                       | 0.8 | 0.6      | 8   | 2   | 5      | 5 ± 1        | -          | -          |
| AGO2 <sub>cw</sub><br>310 K | LAKE1  | 12.6                      | 2.0 | 4.0      | 23  | 6   | 13     | 13 ± 2       | 25         | 2.8        |
|                             | LAKE2  | 5.7                       | 0.8 | 0.7      | 10  | 3   | 6      | 6 ± 1        | -          | -          |

\*Correspond to rounded up values of the mean ± sd number of water molecules in columns 3 and 4



Table S2. Details of simulated systems (Related to Simulation systems preparation section of STAR Methods)

| System  | #   | PDB  | $t_{\text{sim}}$<br>(ns) | Type  | Ensemble | Temp<br>(K) | Start | Size<br>#atoms | Size<br>(nm <sup>3</sup> ) |
|---------|-----|------|--------------------------|-------|----------|-------------|-------|----------------|----------------------------|
| AGO4cw  | S1a | 6OON | 1.21                     | MinEQ | $NpT^*$  | 300         | ----- | 164,443        | 12x12x12                   |
| AGO4cw  | S1b | 6OON | 100                      | EQ    | $NpT$    | 300         | S1a   | 164,443        | 12x12x12                   |
| AGO4cw  | S1c | 6OON | 100                      | EQ    | $NpT$    | 310         | S1a   | 164,443        | 12x12x12                   |
| AGO4ncw | S2a | 6OON | 1.21                     | MinEQ | $NpT^*$  | 300         | ----- | 164,443        | 12x12x12                   |
| AGO4ncw | S2b | 6OON | 100                      | EQ    | $NpT$    | 300         | S2a   | 164,443        | 12x12x12                   |
| AGO4ncw | S2c | 6OON | 61                       | EQ    | $NpT$    | 310         | S2a   | 164,443        | 12x12x12                   |
| AGO2cw  | S3a | 4OLA | 1.21                     | MinEQ | $NpT^*$  | 300         | ----- | 164,230        | 12x12x12                   |
| AGO2cw  | S3b | 4OLA | 100                      | EQ    | $NpT$    | 300         | S3a   | 164,230        | 12x12x12                   |
| AGO2cw  | S3c | 4OLA | 100                      | EQ    | $NpT$    | 310         | S3a   | 164,230        | 12x12x12                   |

Summary of all MD simulations. Asterisk (\*) denotes simulations that consisted of 5000 steps of minimization, 200 ps of dynamics with the backbone of the protein restrained ( $k_{\text{bbr}} = 1 \text{ kcal mol}^{-1} \text{ \AA}^{-2}$ ), and 1 ns of free dynamics in the  $NpT$  ensemble ( $\gamma = 1 \text{ ps}^{-1}$ ).

Table S3. Primer list (Related to Cloning, expression, and purification of AGO proteins and TNRC6B fragment section of STAR Methods)

| Oligonucleotides                                                                                | Source     | Identifier |
|-------------------------------------------------------------------------------------------------|------------|------------|
| AGO2G595I/V615A-FW-<br>CAGCAGCCCGTCATCTTTCTGATAGCAGACGTCAC,<br>CCATTGCCGCCGTGGCGGGCAGCATGGACGCC | This paper | N/A        |
| AGO2G595I/V615A-RV -<br>GGCGTCCATGCTGCCCCGCCACGGCGGCAATGG,<br>GGCGTCCATGCTGCCCCGCCACGGCGGCAATGG | This paper | N/A        |
| AGO2Y420A-FW-<br>GCCGCCCTCCATCCTCGCCGGGGGCAGGAATAAAG<br>C                                       | This paper | N/A        |
| AGO2Y420A-RV -<br>GCTTTATTCTGCCCCGGCGAGGATGGAGGGCGG<br>C                                        | This paper | N/A        |
| AGO2W435A-FW-<br>CCCTGTCCAGGGCGTCGCGGACATGCGGAACAAG<br>CAGT                                     | This paper | N/A        |
| AGO2W435A-RV -<br>ACTGCTTGTTCCGCATGTCCGCGACGCCCTGGACA<br>GGG                                    | This paper | N/A        |
| AGO2L565A-FW-<br>CAGACCCTGTCCAACCTCTGCGCGAAGATCAACGT<br>CAAGCTGGGA                              | This paper | N/A        |
| AGO2L565A-RV -<br>TCCCAGCTTGACGTTGATCTTCGCGCAGAGGTTGG<br>ACAGGGTCTG                             | This paper | N/A        |
| AGO2N568A-FW-<br>GTCCAACCTCTGCCTGAAGATCGCCGTC                                                   | This paper | N/A        |
| AGO2N568A-RV -<br>CGCCTCCAGCTTGACGGCGATCTTCAGGCA                                                | This paper | N/A        |
| AGO2N575A-FW-<br>GTCAAGCTGGGAGGCGTGGCCAAC                                                       | This paper | N/A        |
| AGO2N575A-RV -<br>CTGGGGCAGCAGGATGTTGGCCACGCCTCCC                                               | This paper | N/A        |
| AGO2 L578A -FW-<br>CTGGGAGGCGTGAACAACATCGCGCTGCCCCAGG<br>GCAGG                                  | This paper | N/A        |
| AGO2 L578A -RV -<br>CCTGCCCTGGGGCAGCGCGATGTTGTTACGCCTC<br>CCAG                                  | This paper | N/A        |
| AGO2S617A -FW-<br>CCGCCGTGGTGGGCGCCATGGACGCCACCCC                                               | This paper | N/A        |
| AGO2S617A -RV -<br>GGGGTGGGCGTCCATGGCGCCCACCACGGCGG                                             | This paper | N/A        |
| AGO2Y625A -FW- CGCCCACCCCAATCGCGCCTGC                                                           | This paper | N/A        |
| AGO2Y625A -RV -<br>CGCACGGTGGCGCAGGCGCGATTGGG                                                   | This paper | N/A        |
| AGO2Y805A-FW-TCCCAGCCAGCATACGCCGCTC                                                             | This paper | N/A        |
| AGO2Y805A-RV -<br>GGCCACCAGGTGAGCGGCGTATGCTGGCG                                                 | This paper | N/A        |
| AGO2-4SI-FW-<br>TGCAGCAGCACCGGCAGGAGATCTCCCAAGAGCTC<br>CTCTACAGTCAAGA                           | This paper | N/A        |
| AGO2-4SI-RV -<br>GCGGCCAGGTCTTGATGATCTCTTGAAGTAGAG<br>GAGCTCTTGG                                | This paper | N/A        |

|                                                                                                                                                                                          |            |     |
|------------------------------------------------------------------------------------------------------------------------------------------------------------------------------------------|------------|-----|
| AGO4m-FW-<br>GACTTCCCGGCAGGAGATCTCCAAGAGCTCCTCT<br>ACAGTCAAGA,<br>GACTTCCCGGCAGGAGATCTCCAAGAGCTCCTCT<br>ACAGTCAAGA,<br>GGAGGGGTATCTGAGGGACAATTCCAGCAGGTTCT<br>CCACCACGAGTTGCTGGCCATCCGTG | This paper | N/A |
| AGO4m-RV -<br>AACCATGTTAGTCAGGTCCTGGATGACCTCTTACT<br>GTAGAGGAGCTCTTGG,<br>CTTGCCCTAAATGCTACAAGATGGGCATAATATGCA<br>GGGGC,<br>GGCCGGTAATCTTCTTCCAATTGATACAGGCCTCA<br>CGGATGGCCAGCAACT      | This paper | N/A |
| AGO4mΔ4SI-FW-<br>GTGCAGACTTCCCGGCAGGAGGTCATCCAGGACCT<br>GACTAA                                                                                                                           | This paper | N/A |
| AGO4mΔ4SI-RV-<br>TTAGTCAGGTCCTGGATGACCTCCTGCCGGGAAGT<br>CTGCAC                                                                                                                           | This paper | N/A |
| TNRC6B-599-683-FW-<br>GCGCGCCTCGAGTCAGAGCTCCCCCATCCAGA                                                                                                                                   | This paper | N/A |
| TNRC6B-599-683-RV-<br>GCGCGCGGATCCGATTGTCAGGCTGTCTTGCAGA                                                                                                                                 | This paper | N/A |
| TNRC6B-507-598-FW-<br>GCGCGCGGATCCTCTCAGGGAGAATGGAAACAGC                                                                                                                                 | This paper | N/A |
| TNRC6B-507-598-RV-<br>GCGCGCCTCGAGTCAAGGATGTGTGGGCCTGTACG                                                                                                                                | This paper | N/A |
| TNRC6B-684-770-FW-<br>GCGCGCGGATCCTCAGCCTCTACAGAGTGGAAGA<br>CC                                                                                                                           | This paper | N/A |
| TNRC6B-684-770-RV-<br>GCGCGCCTCGAGTCAAGACACAGGTTTACTTGCAG<br>AACTTTC                                                                                                                     | This paper | N/A |
| TNRC6B-771-860-FW-<br>GCGCGCGGATCCGGGTGGGGTGAAGGAGGG                                                                                                                                     | This paper | N/A |
| TNRC6B-771-860-RV-<br>GCGCGCCTCGAGTCACTCCAGCTGGAATTGGAAGG                                                                                                                                | This paper | N/A |
| TNRC6B-869-916-FW-<br>GCGCGCGGATCCACTGTGGATAATGGTACTTCAGC<br>ATG                                                                                                                         | This paper | N/A |
| TNRC6B-869-916-RV-<br>GCGCGCAAGCTTTCAGGGTTCCCCCAGCTGG                                                                                                                                    | This paper | N/A |
| TNRC6B-616-636-FW-<br>CAAATTAAGCAGGACACAGTGTGGTACTCGAGTCT<br>GGTAAAGAAACCG                                                                                                               | This paper | N/A |
| TNRC6B-616-636-RV-<br>CGGTTTCTTTACCAGACTCGAGTCACCACACTGTGT<br>CCTGCTTAATTTG                                                                                                              | This paper | N/A |
| TNRC6B-623-636-FW-<br>ACAGAGAACAGATTGCTGCATCCTGGGGCCAAACT<br>CAAATTAAGC                                                                                                                  | This paper | N/A |
| TNRC6B-623-636-RV-<br>GCTTAATTTGAGTTTGGCCCCAGGATGCAGCAATCT<br>GTTCTCTGT                                                                                                                  | This paper | N/A |
| TNRC6B-617-634-FW-<br>GCGCGCGGATCCGTGCTCTCAAACACTGGCTGGG                                                                                                                                 | This paper | N/A |
| TNRC6B-617-634-RV-GCGCGCCTCGAGTCA<br>AATGTCCCACTGTGTCCTGC                                                                                                                                | This paper | N/A |

|                                                                                 |            |     |
|---------------------------------------------------------------------------------|------------|-----|
| TNRC6B-617-634(Q625E)-FW-<br>TCAAACACTGGCTGGGGCGAAACTCAAATTAAGCA<br>GGACACAGTGT | This paper | N/A |
| TNRC6B-617-634(Q625E)-RV-<br>ACACTGTGTCCTGCTTAATTTGAGTTTCGCCCCAGC<br>CAGTGTTTGA | This paper | N/A |
| TNRC6B-617-634(K629A)-FW-<br>GCTGGGGCCAAACTCAAGCTAAGCAGGACACAGTG<br>TGGGA       | This paper | N/A |
| TNRC6B-617-634(K629A)-RV-<br>TCCCACACTGTGTCCTGCTTAGCTTGAGTTTGGCCC<br>CAGC       | This paper | N/A |
| TNRC6B-617-634(Q630R)-FW-<br>GGGGCCAAACTCAAATTAAGCGGGACACAGTGTGG<br>GACATTTGA   | This paper | N/A |
| TNRC6B-617-634(Q630R)-RV-<br>TCAAATGTCCCACACTGTGTCCCGCTTAATTTGAGT<br>TTGGCCCC   | This paper | N/A |
